# Supplementary material
Source: publisher site journal article supplement (https://www.dovepress.com/article/532905)
Supplement: Supplementary file 1 [file 532905%20Supplementary%20Material.docx]

**Ciprofol ameliorates depressive-like behaviors in chronic unpredictable mild stress mice via PPARα-dependent regulation of the ERK/CREB signaling pathway**

Jiaqi Li#,1, Meiqin Chen#,2,3,4, Yuan Lin4, Qian Wu4, Jiahong Shen5, Yuxin Wen6, Siyue Li1, Jie Zhang*,2,3,4, Jianliang Sun*,1,5

1. Zhejiang University School of Medicine, Hangzhou, China

2. Department of Neurology, Sichuan Provincial People's Hospital, School of Medicine, University of Electronic Science and Technology of China, Chengdu, China

3. The Key Laboratory of Neural and Vascular Biology, Ministry of Education, College of Basic Medicine, Hebei Medical University, Shijiazhuang, China

4. Institute of Neuroscience, College of Medicine, Xiamen University, Xiamen, China

5. Department of Anesthesiology, Affiliated Hangzhou First People's Hospital, School of Medicine, Westlake University, Hangzhou, China

6. Department of Anesthesiology, The Sencond Affiliated Hospital of Zhejiang University, Hangzhou, China

Jiaqi Li#,1

Meiqin Chen#,2,3,4
#These authors contributed equally to this work

*Correspondence: Jianliang Sun

Department of Anesthesiology, Affiliated Hangzhou First People's Hospital, School of Medicine, Westlake University, Hangzhou, China.

Tel (86)13958069878

Email jxmzsjl@163.com

**Supplementary material**

| **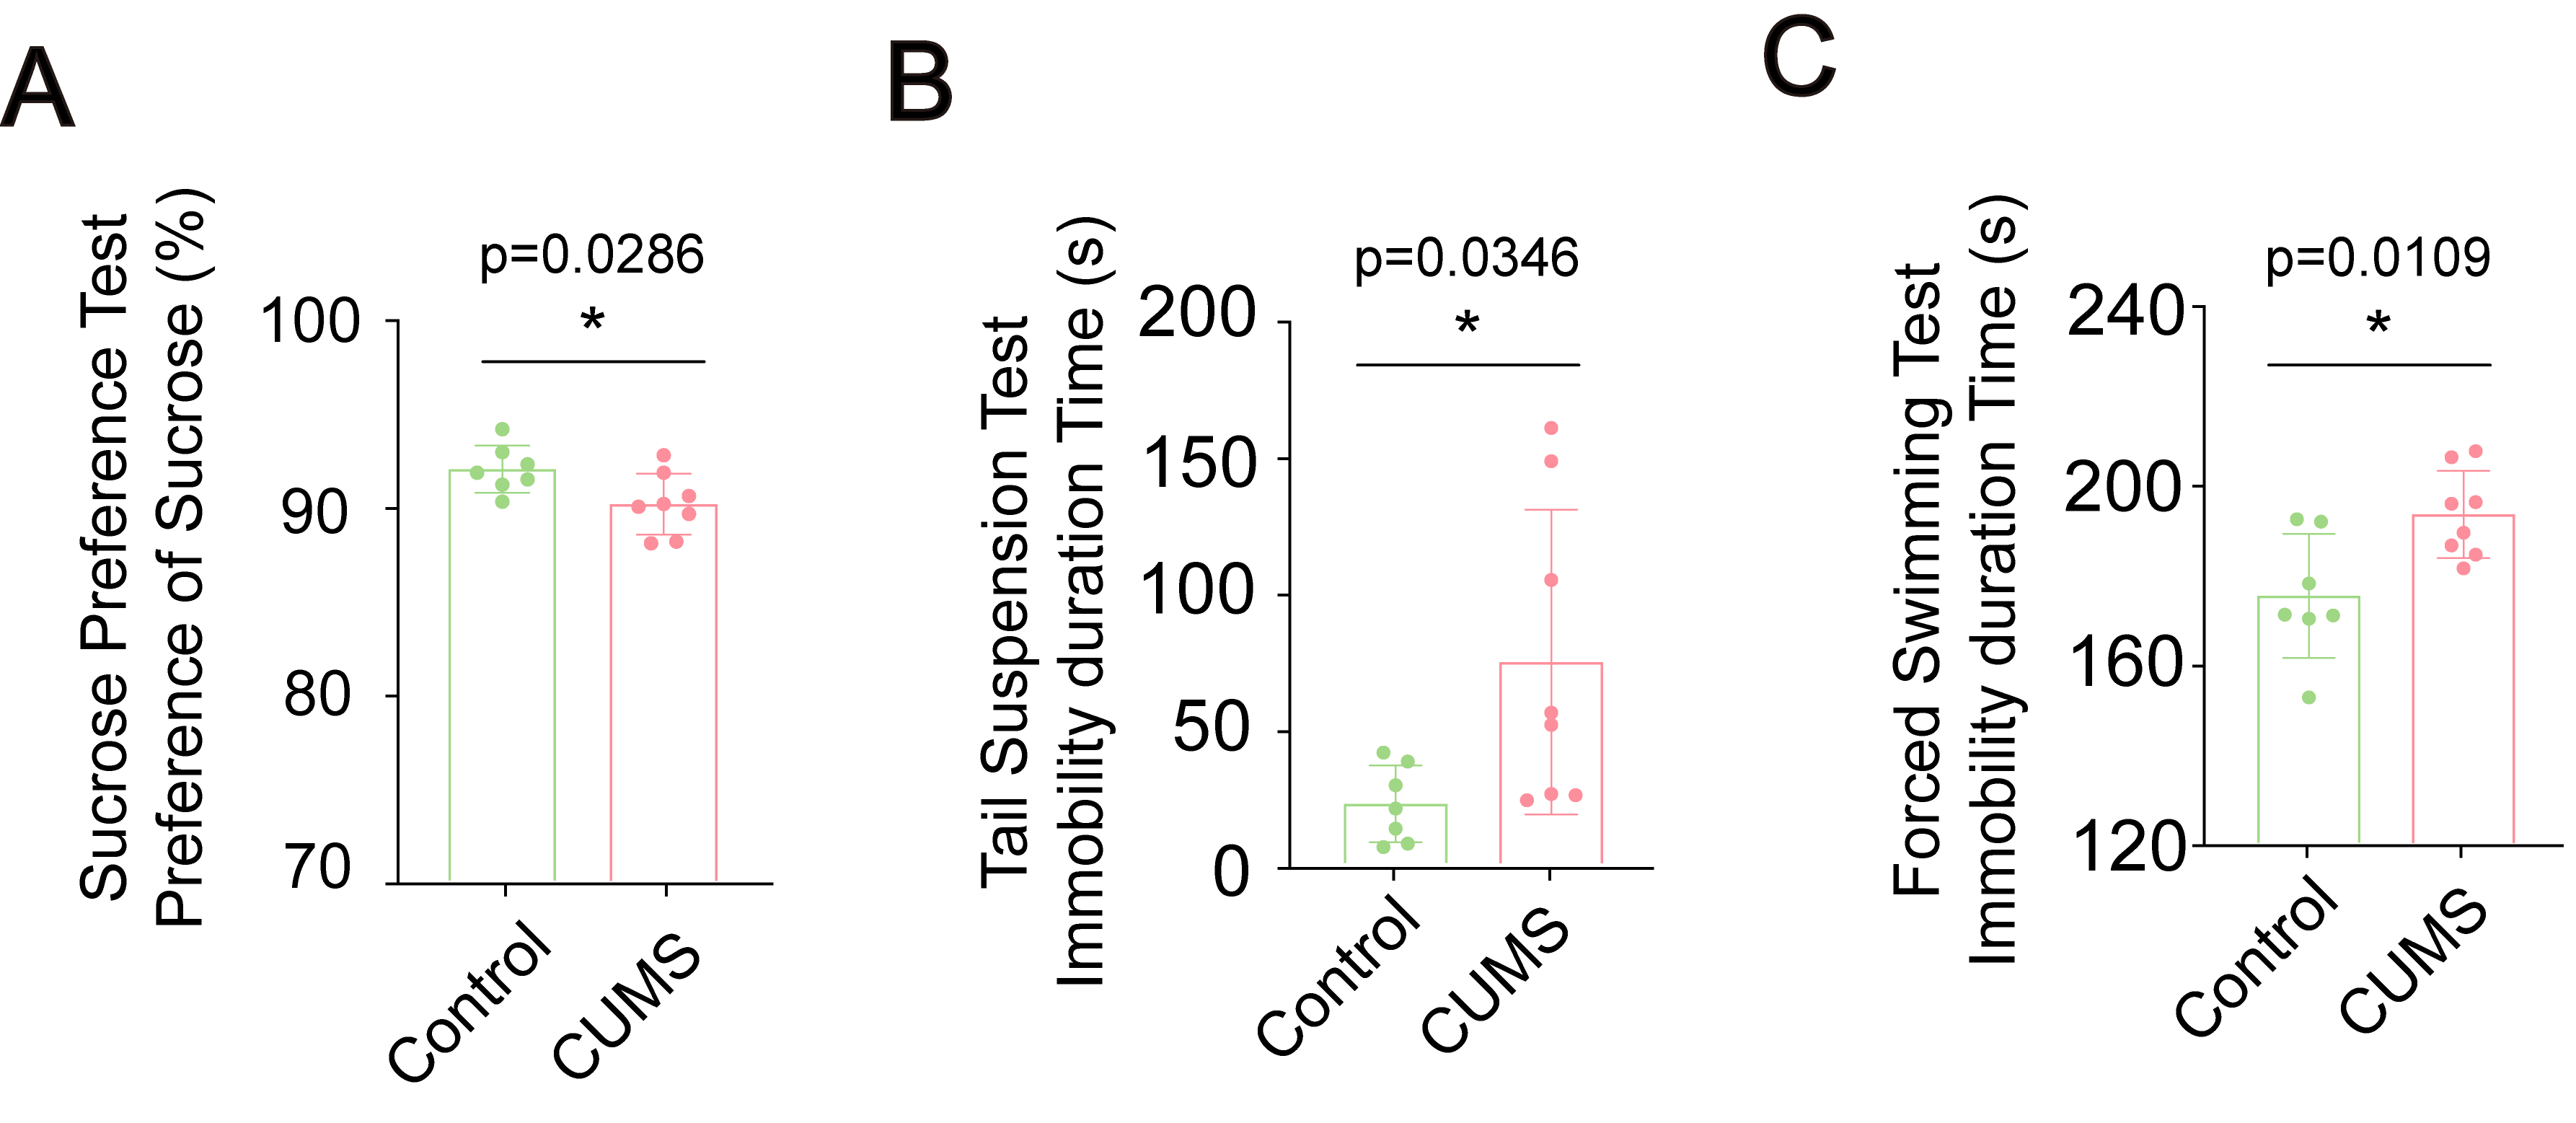** |
| --- |
| **Figure S1. Establishment of the CUMS-induced depression-like mice.**  (A) Quantification of sucrose preference in the sucrose preference test (SPT) of the Control (n = 7) and CUMS (n = 8) group. (B) Quantification of the immobility time in the tail suspension test (TST) of the Control (n = 7) and CUMS (n = 8) group. (C) Quantification of the immobility time in the forced swimming test (FST) of the Control (n = 7) and CUMS (n = 8) group. CUMS, chronic unpredictable mild stress. All data are expressed as mean ± SD. Quantitative data are analyzed using unpaired t test, *p < 0.05. |

| **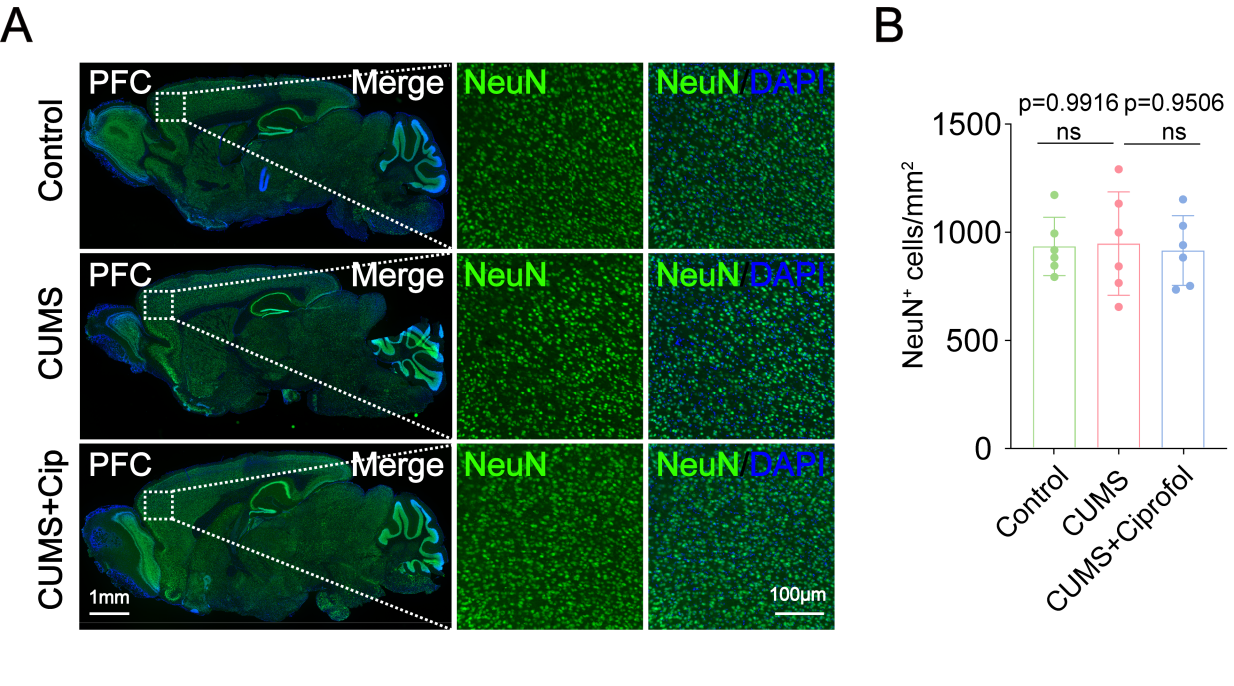** |
| --- |
| **Figure S2. Ciprofol exposure had no effect on cortical neuron density in CUMS-induced depression-like mice.**  (A) Immunostaining of NeuN (green) in the PFC of the Control group, CUMS group and CUMS + Ciprofol group. (B) Quantification of the number of NeuN+ cells per mm2 in the PFC as shown in (A). Images of selected regions were shown at higher magnification. (n = 6 per group) CUMS, chronic unpredictable mild stress. All data are expressed as mean ± SD. Quantitative data are analyzed using one-way ANOVA followed by Tukey’s post hoc test. Scale bars: 1 mm or 100 μm. |

| 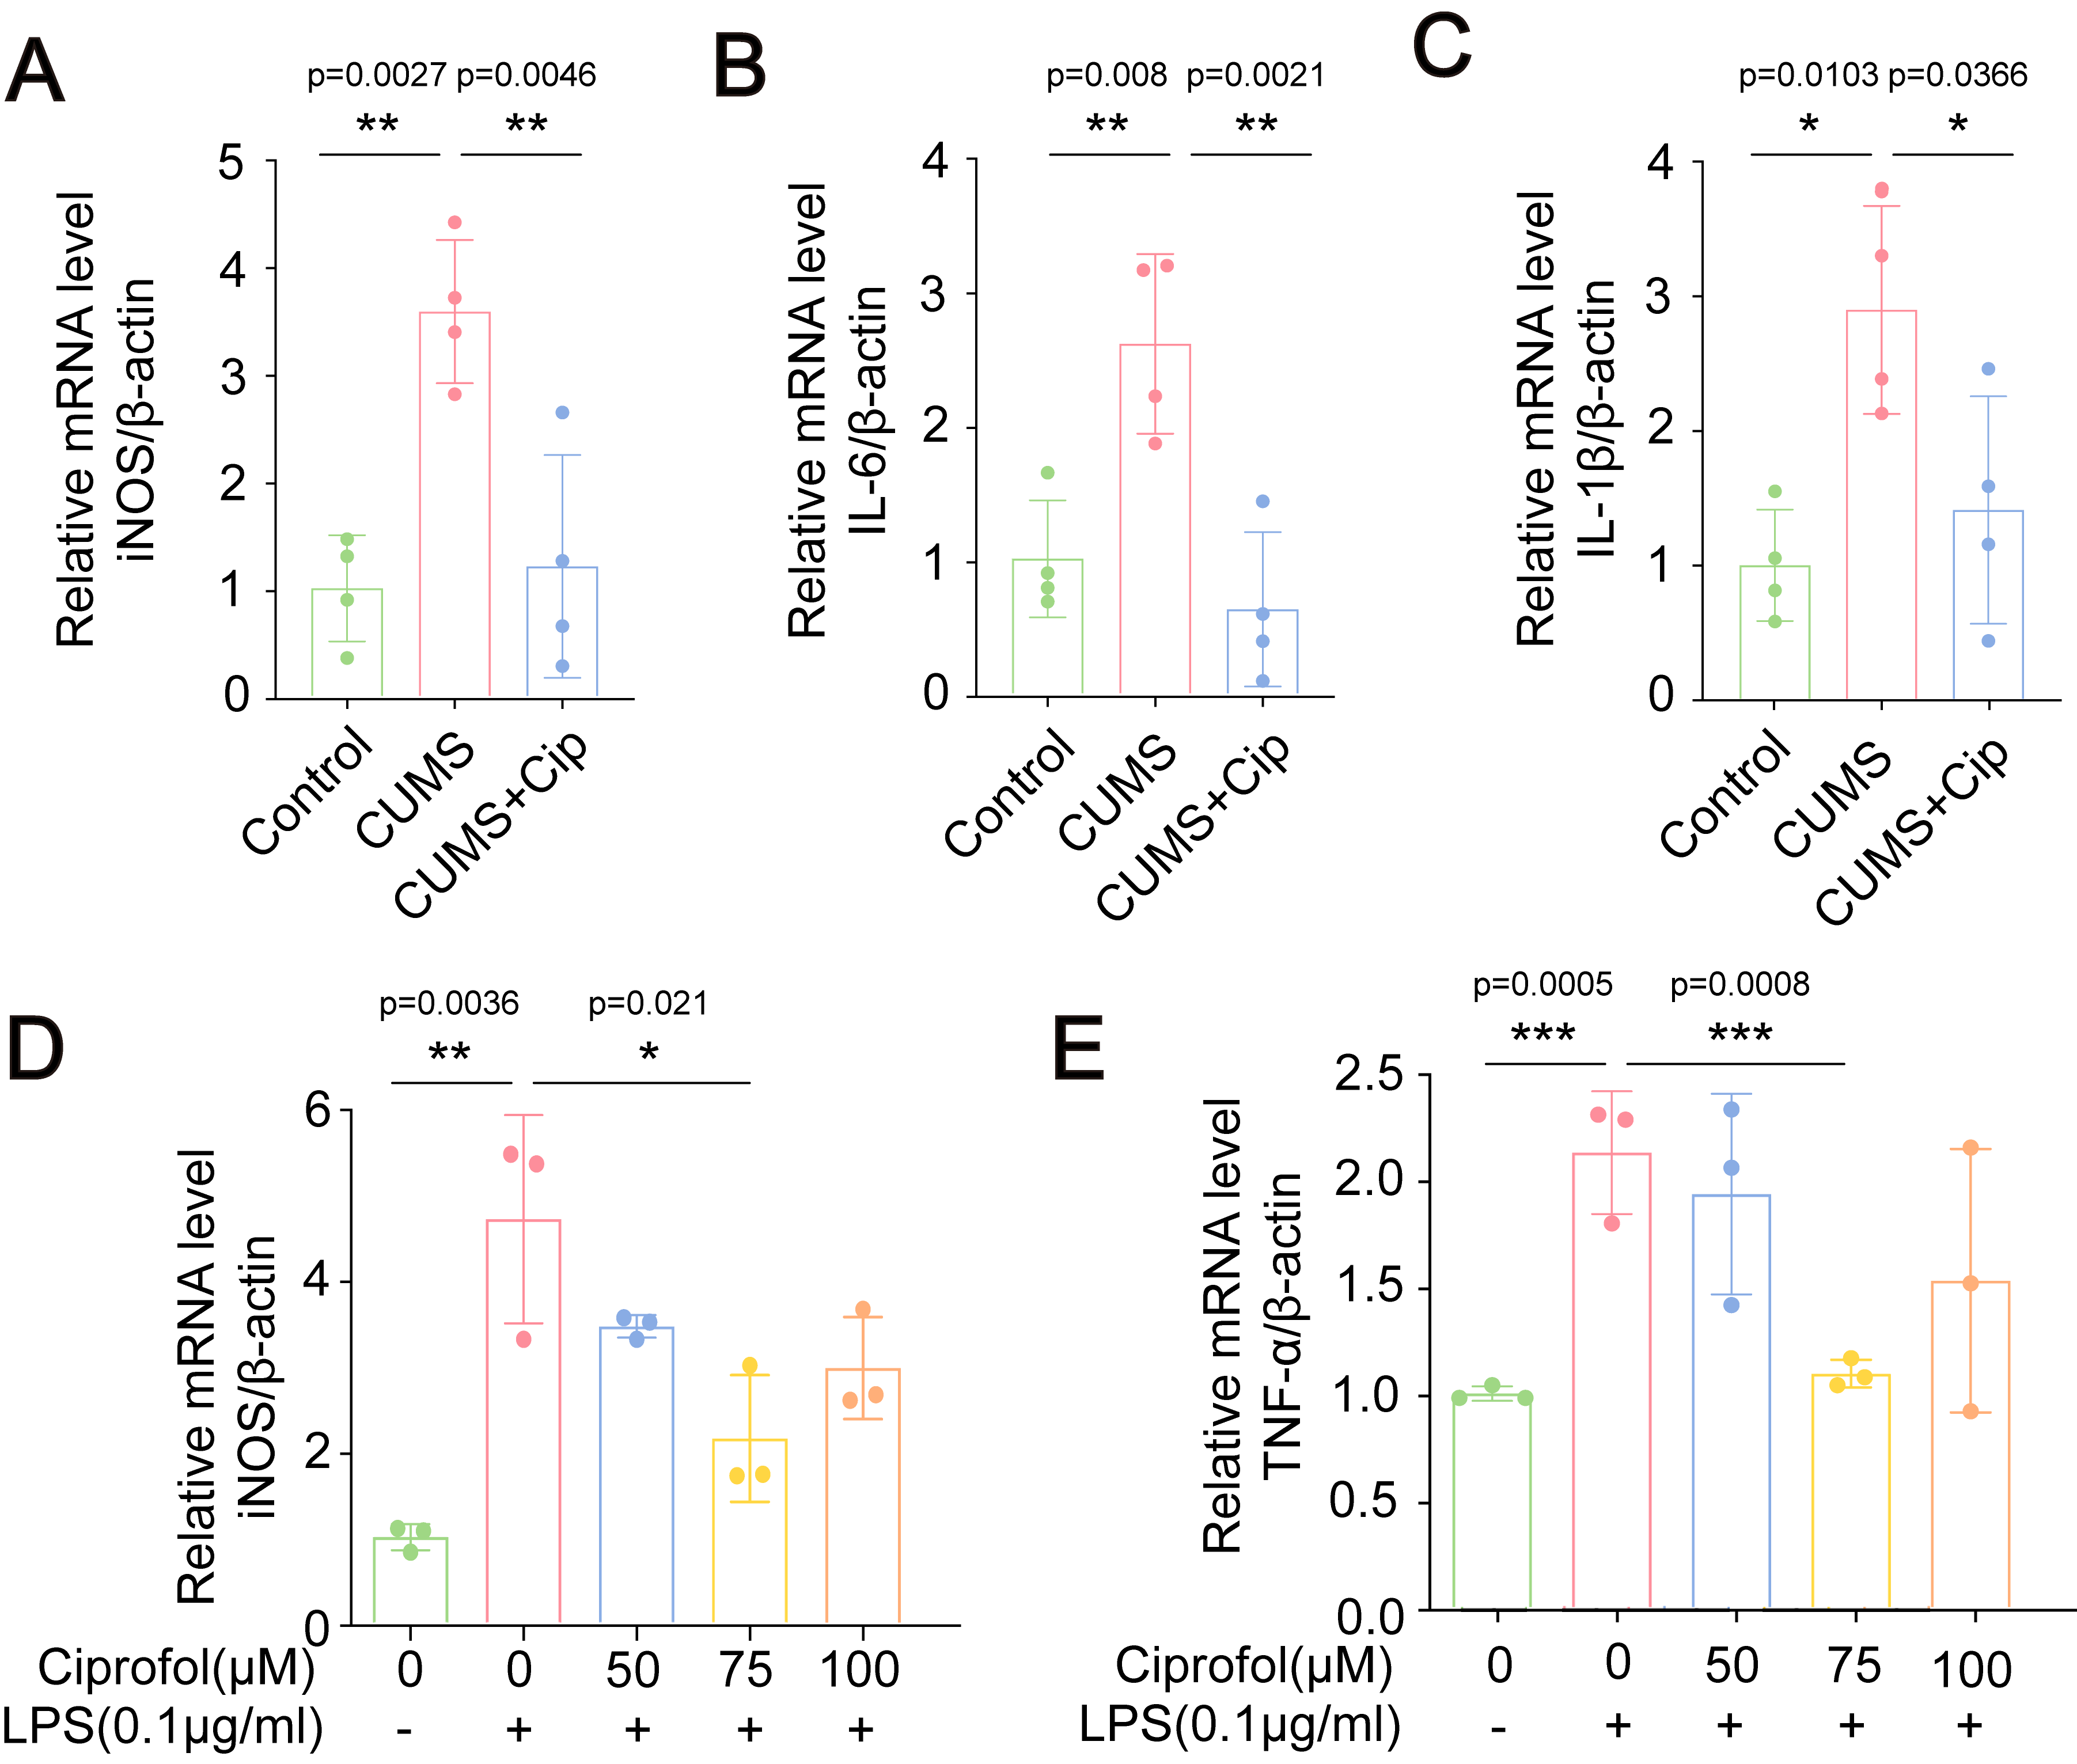 |
| --- |
| **Figure S3. Ciprofol exposure reduces the mRNA expression of cytokines and chemokines in CUMS mice and BV2 cells.**  (A-C) Quantification of relative mRNA level of inducible nitric oxide synthase (iNOS, A), Interleukin-6 (IL-6, B) and Interleukin-1β (IL-1β, C) in the PFC of the Control group, CUMS group and CUMS + Ciprofol group. (n=4 per group) (D-E) Quantification of relative mRNA level of iNOS (D), tumour necrosis factor-α (TNF-α, E) in BV2 of the Control group, LPS group, LPS + 50 uM Ciprofol group, LPS + 75 uM Ciprofol group and LPS + 100 uM Ciprofol group. (n=3 per group). CUMS, chronic unpredictable mild stress. All data are expressed as mean ± SD. Data were analyzed using one-way ANOVA followed by Tukey’s post hoc test, normalized to β-actin using the 2−ΔΔCt method and expressed as fold change relative to the Control group. *p < 0.05, **p < 0.01, ***p < 0.001. |

| 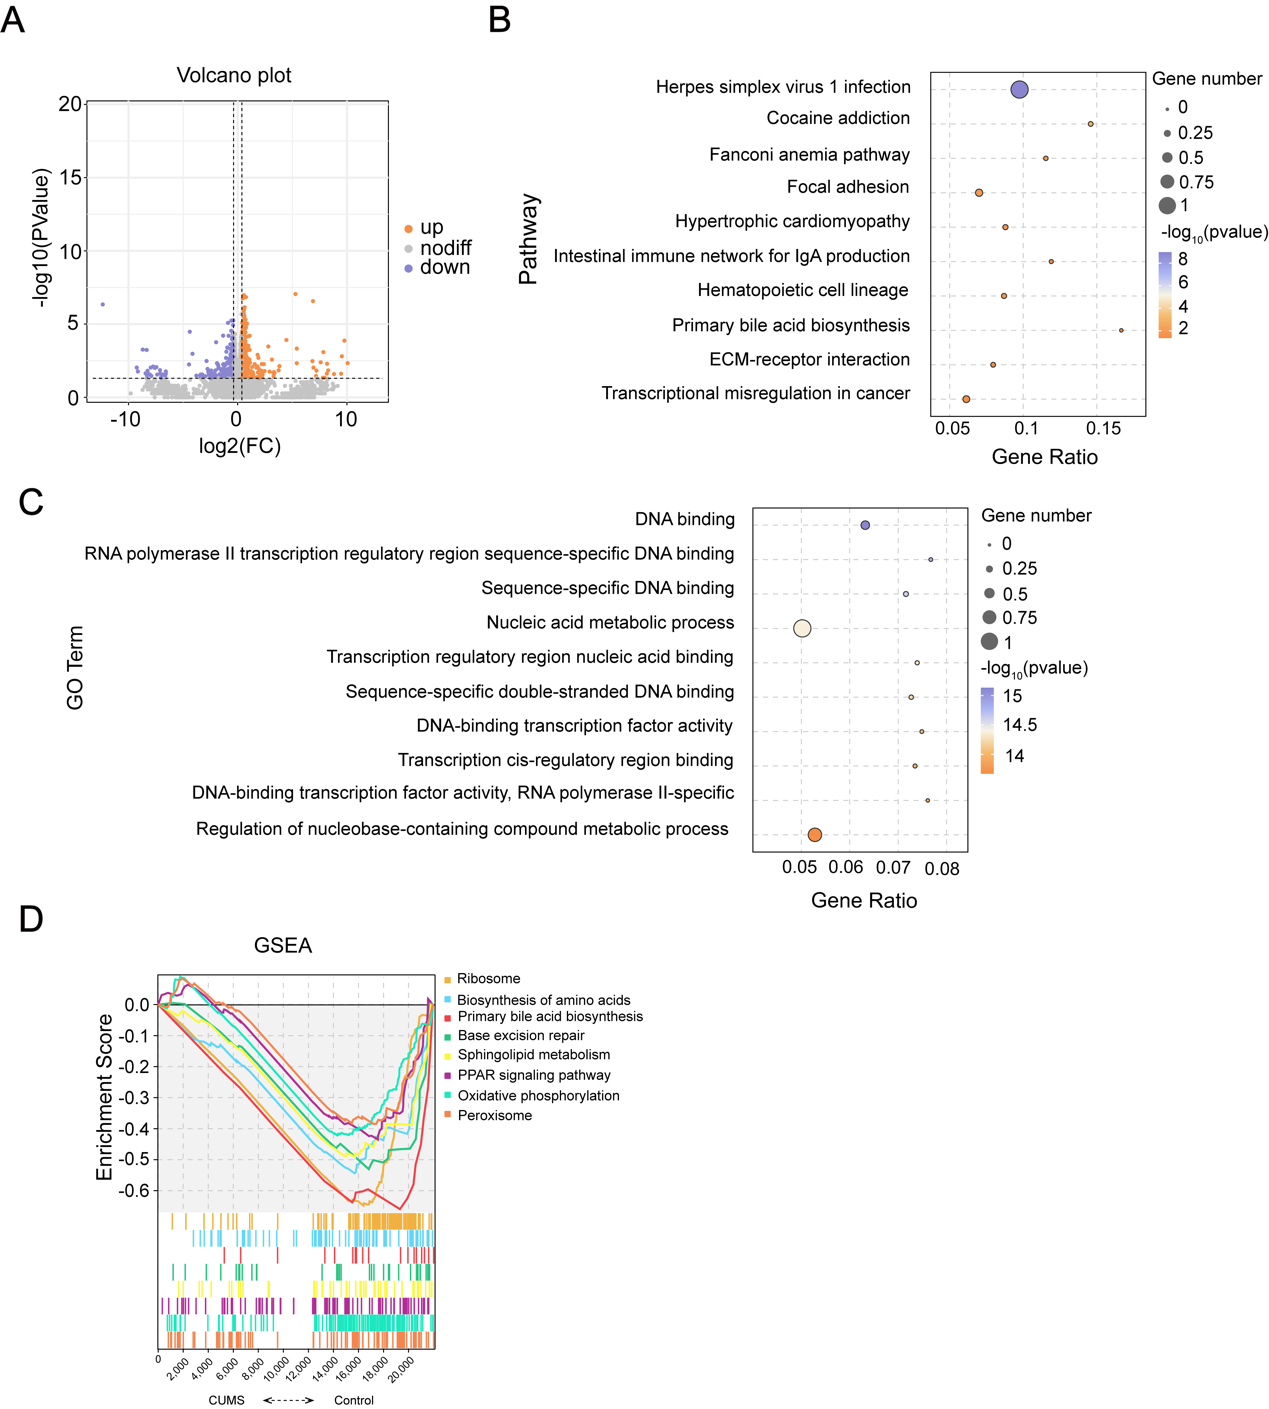 |
| --- |
| **Figure S4 Differentially expressed genes and enrichment analyses of the differentially expressed genes in the cortexes of the control and CUMS groups.** (A) The volcano plot showing differential expression genes between the Control and CUMS group mouse cortex. Orange dots indicate up-regulatied genes and purple dots indicate down-regulated genes. (B) The top 10 pathways of Kyoto Encyclopedia of Genes and Genomes (KEGG) enrichment analysis. (C) The top 10 terms of Gene Ontology (GO) analysis. (D) The gene set enrichment analysis (GSEA) results based on pathways terms between the Control and CUMS group. CUMS, chronic unpredictable mild stress. |
